# Supplementary material for: Carnosic Acid Attenuates Cadmium Induced Nephrotoxicity by Inhibiting Oxidative Stress, Promoting Nrf2/HO-1 Signalling and Impairing TGF-β1/Smad/Collagen IV Signalling
Source: PubMed Central journal article supplement (PMC6891359; doi:10.3390/molecules24224176), 2019-11-18
Supplement: molecules-24-04176-s001.pdf [file molecules-24-04176-s001.pdf]

**Table S1.** The effects of CdCl<sub>2</sub> and/or CA on serum biochemical parameters in mice.

| Treatments                | Vehicle       | CA (4 mg/kg)   | CdCl <sub>2</sub> (4 mg/kg) | CA (4 mg/kg) + CdCl <sub>2</sub> (4 mg/kg) |
|---------------------------|---------------|----------------|-----------------------------|--------------------------------------------|
| Serum Cd (ppm)            | 0.03 ± 0.0002 | 0.007 ± 0.0001 | 14.23 ± 1.79 <sup>#</sup>   | 11.95 ± 1.33                               |
| Total cholesterol (mg/dl) | 80.33 ± 8.14  | 78.67 ± 6.28   | 135.50 ± 14.02 <sup>#</sup> | 117.87 ± 12.12 <sup>*</sup>                |
| HDL-cholesterol (mg/dl)   | 32.14 ± 3.13  | 31.08 ± 2.78   | 20.24 ± 2.13 <sup>#</sup>   | 25.18 ± 2.45 <sup>*</sup>                  |
| Triglycerides (mg/dl)     | 89.15 ± 7.45  | 90.37 ± 8.22   | 122.45 ± 12.08 <sup>#</sup> | 105.47 ± 10.12 <sup>*</sup>                |
| Urea (mg/dl)              | 18.17 ± 1.84  | 18.02 ± 1.33   | 33.27 ± 3.21 <sup>#</sup>   | 25.12 ± 2.19 <sup>**</sup>                 |
| Uric acid (mg/dl)         | 2.35 ± 0.21   | 2.18 ± 0.25    | 3.79 ± 0.31 <sup>#</sup>    | 2.92 ± 0.33 <sup>**</sup>                  |
| Creatinine (mg/dl)        | 0.42 ± 0.04   | 0.39 ± 0.04    | 0.65 ± 0.05 <sup>#</sup>    | 0.57 ± 0.04 <sup>*</sup>                   |

Data were represented as the mean ± SD (n = 6). <sup>#</sup>Values significantly (p < 0.01) differ from vehicle-treated group. <sup>\*</sup>Values significantly (p < 0.05) differ from only CdCl<sub>2</sub>-treated group. <sup>\*\*</sup>Values significantly (p < 0.01) differ from only CdCl<sub>2</sub>-treated group.

**Table S2.** The effects of CdCl<sub>2</sub> and/or CA on kidney mass, Cd accumulation, Cd clearance, and renal function related urine parameters in mice.

| Treatments                                 | Vehicle         | CA (4 mg/kg)  | CdCl <sub>2</sub> (4 mg/kg) | CA (4 mg/kg) + CdCl <sub>2</sub> (4 mg/kg) |
|--------------------------------------------|-----------------|---------------|-----------------------------|--------------------------------------------|
| Kidney mass (mg)                           | 41.45 ± 3.82    | 42.33 ± 4.02  | 55.17 ± 5.54 <sup>#</sup>   | 47.12 ± 4.23 <sup>*</sup>                  |
| Kidney mass/body mass (x 10 <sup>3</sup> ) | 15.28 ± 1.48    | 13.94 ± 1.24  | 20.33 ± 2.17 <sup>#</sup>   | 17.89 ± 1.31 <sup>*</sup>                  |
| Cd burden in kidney (ppm of wet tissue)    | 0.02 ± 0.0003   | 0.01 ± 0.0004 | 16.76 ± 1.97 <sup>#</sup>   | 14.98 ± 1.12 <sup>*</sup>                  |
| Urinary Cd (ppm)                           | ND <sup>1</sup> | ND            | 0.76 ± 0.22 <sup>#</sup>    | 10.22 ± 1.54 <sup>**</sup>                 |
| Urinary creatinine (mg/dl)                 | 60.39 ± 5.87    | 58.18 ± 6.12  | 43.56 ± 4.51 <sup>#</sup>   | 51.56 ± 5.08 <sup>*</sup>                  |
| Urinary albumin (mg/dl)                    | 2.74 ± 0.28     | 2.77 ± 0.24   | 5.48 ± 0.52 <sup>#</sup>    | 4.67 ± 0.45 <sup>**</sup>                  |

Data were represented as the mean ± SD (n = 6). <sup>#</sup>Values significantly (p < 0.01) differ from vehicle-treated group. <sup>\*</sup>Values significantly (p < 0.05) differ from only CdCl<sub>2</sub>-treated group. <sup>\*\*</sup>Values significantly (p < 0.01) differ from only CdCl<sub>2</sub>-treated group.
